# Supplementary material for: An umbrella review and meta‐analysis of renin–angiotensin system drugs use and COVID‐19 outcomes
Source: PubMed Central journal article supplement (PMC9874890; doi:10.1111/eci.13888), 2022-10-19
Supplement: ECI-53-0-s002.pdf [file ECI-53-0-s002.pdf]

A

## Severe COVID-19 for ACEIs

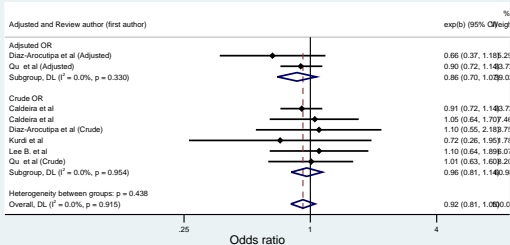

NOTE: Weights and between-subgroup heterogeneity test are from random-effects model

B

## Severe COVID-19 for ACEIs

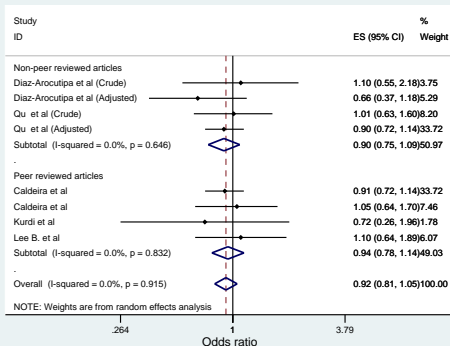

NOTE: Weights are from random effects analysis

C

## Severe COVID-19 for ACEIs

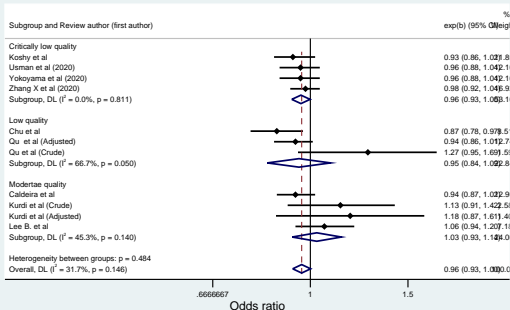

NOTE: Weights and between-subgroup heterogeneity test are from random-effects model

D

## Severe COVID-19 for ACEIs

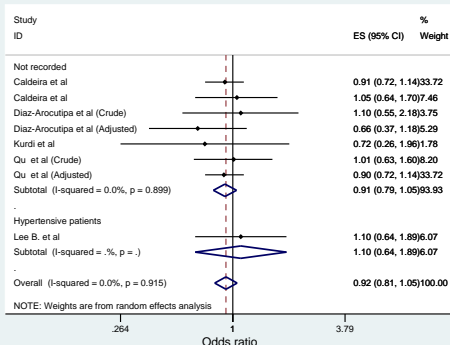

NOTE: Weights are from random effects analysis
