# Supplementary material for: An umbrella review and meta‐analysis of renin–angiotensin system drugs use and COVID‐19 outcomes
Source: PubMed Central journal article supplement (PMC9874890; doi:10.1111/eci.13888), 2022-10-19

Supplementary file 10. Publication bias funnel plot for the outcomes with  $\geq 10$  studies

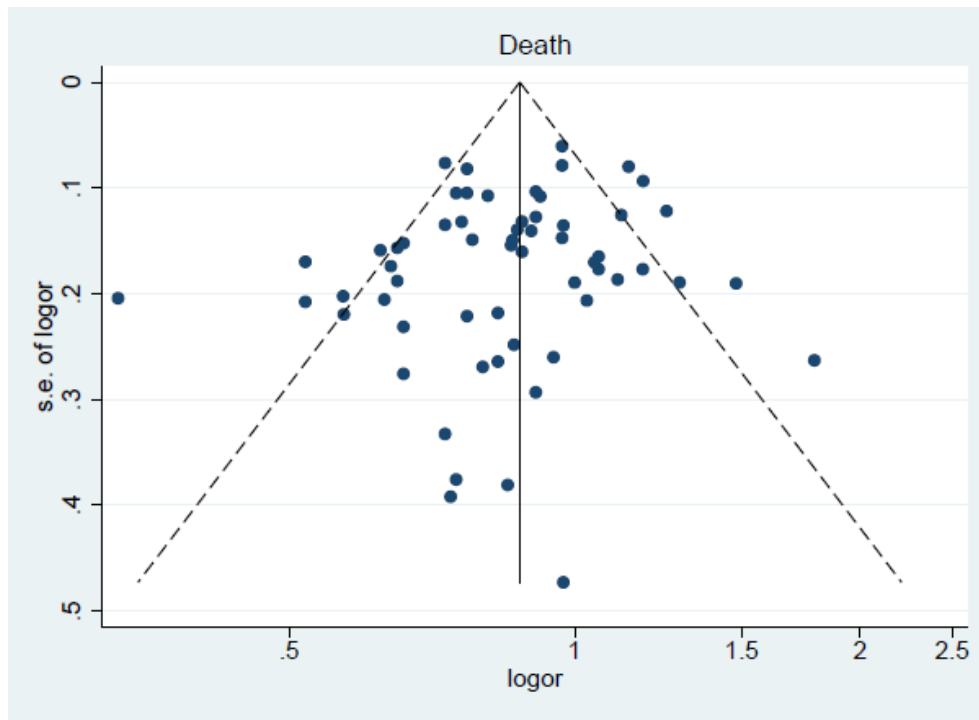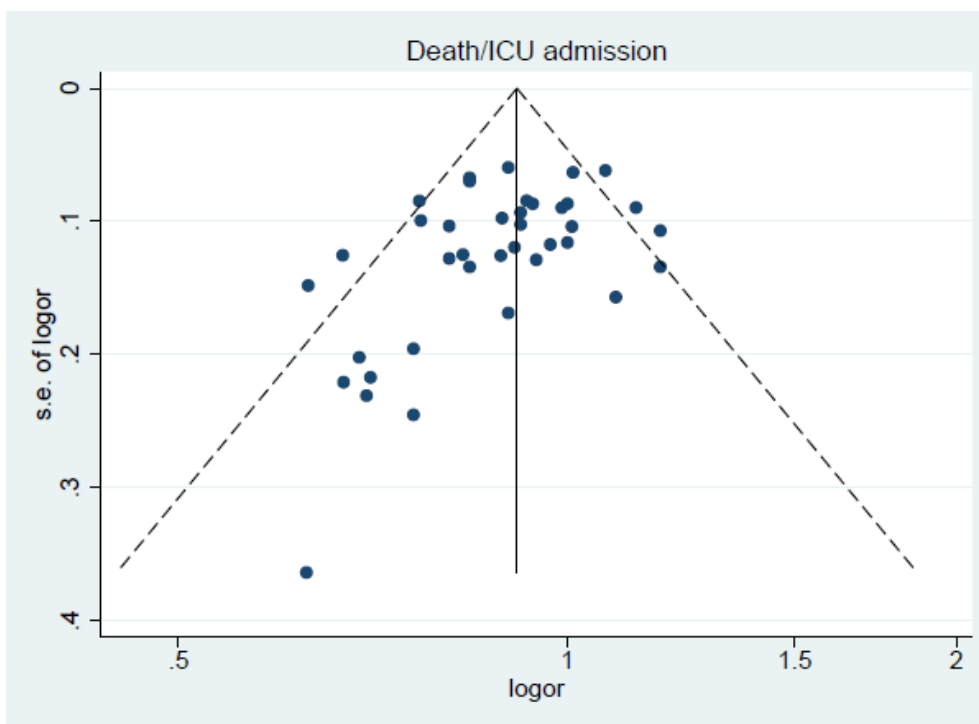

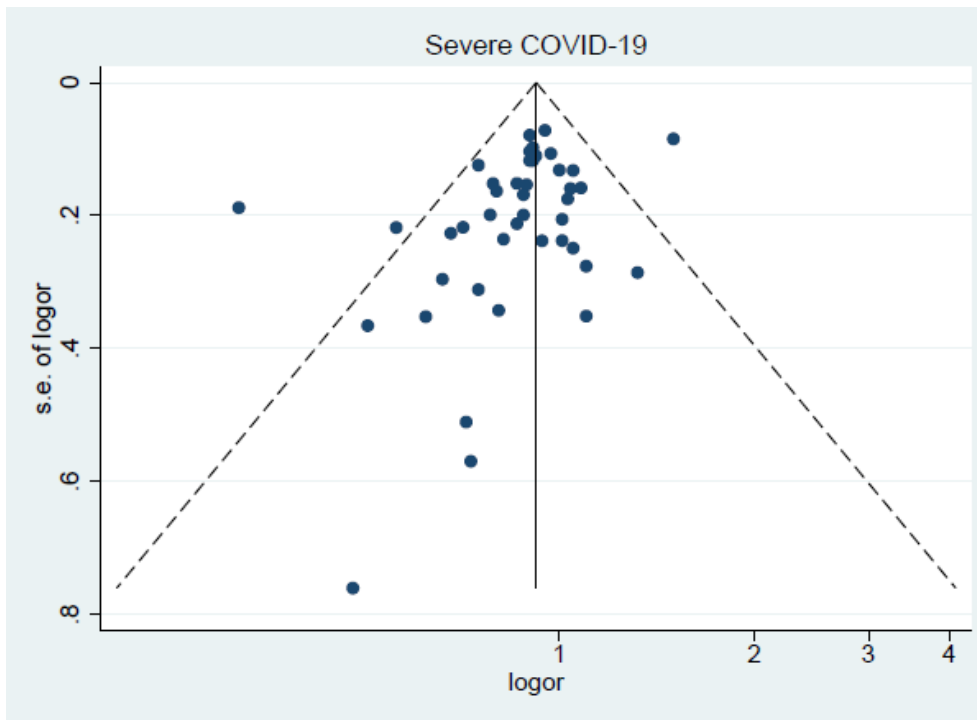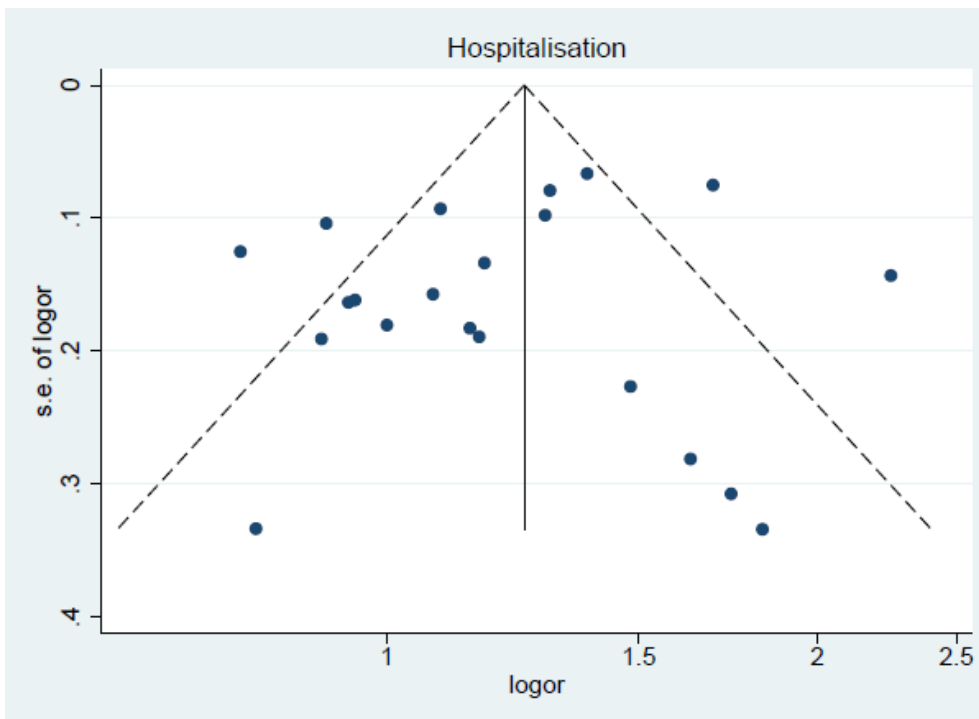

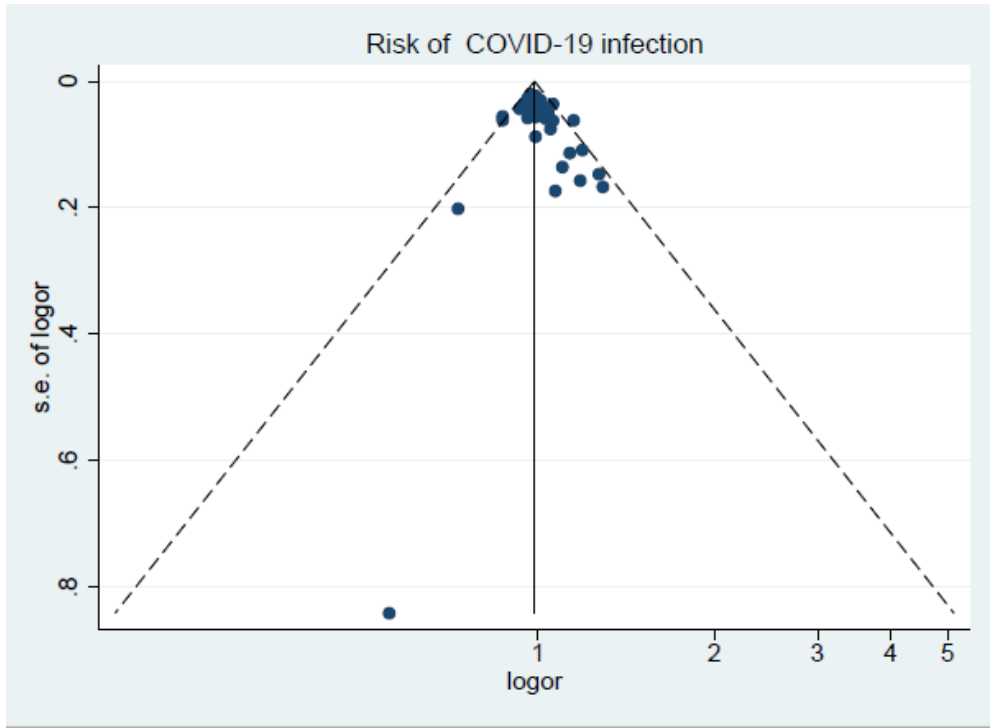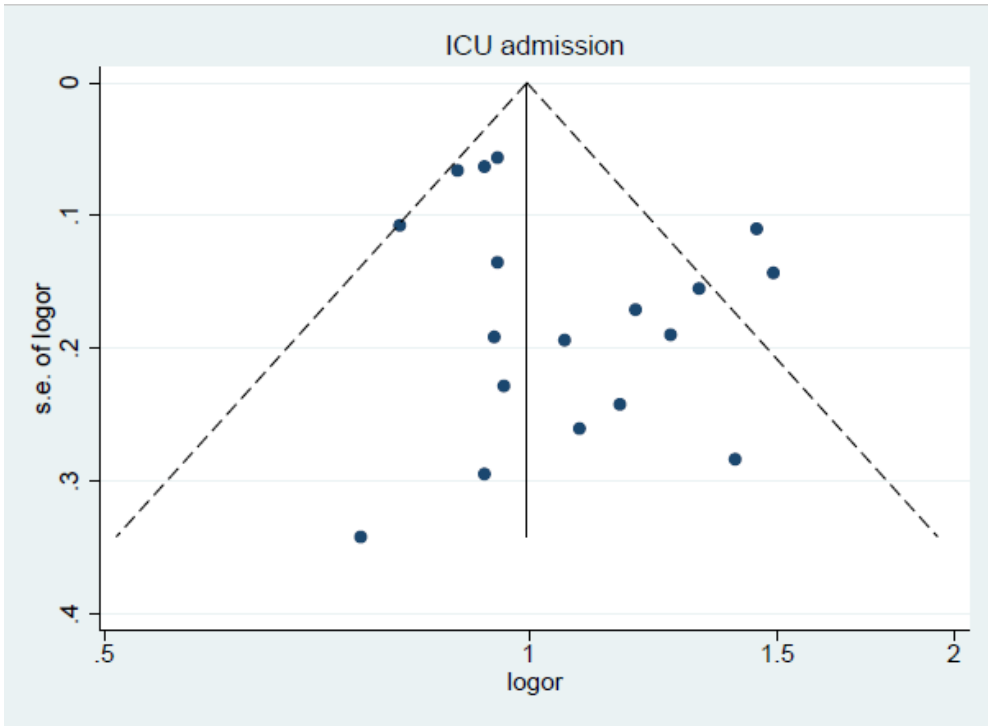

Supplement: ECI-53-0-s004.pdf [file ECI-53-0-s004.pdf]
