# Supplementary material for: An umbrella review and meta‐analysis of renin–angiotensin system drugs use and COVID‐19 outcomes
Source: PubMed Central journal article supplement (PMC9874890; doi:10.1111/eci.13888), 2022-10-19

**A** Severe COVID-19 for ACEIs/ARBs

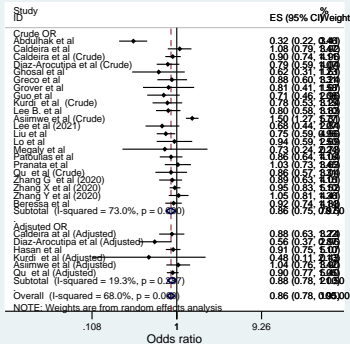

**B** Severe COVID-19 for ACEIs/ARBs

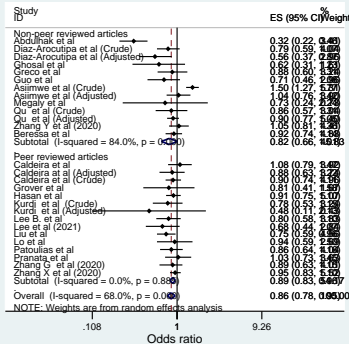

**C** Severe COVID-19 for ACEIs/ARBs

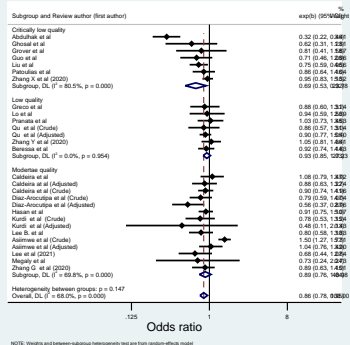

**D** Severe COVID-19 for ACEIs/ARBs

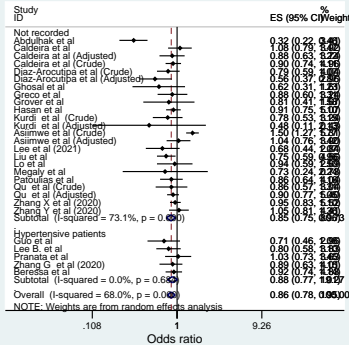

Supplement: ECI-53-0-s018.pdf [file ECI-53-0-s018.pdf]
