# Supplementary material for: An umbrella review and meta‐analysis of renin–angiotensin system drugs use and COVID‐19 outcomes
Source: Eur J Clin Invest. 2022 Oct 19;53(2):e13888. doi: 10.1111/eci.13888 (PMC9874890; doi:10.1111/eci.13888)
Supplement: Supplementary file 6 — Supplementary file S6 [file ECI-53-0-s014.pdf]

### A Death for ACEIs/ARBs

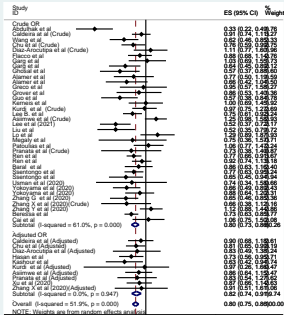

NOTE: Weights are from random effects analysis

**C** Death for ACEIs/ARBs

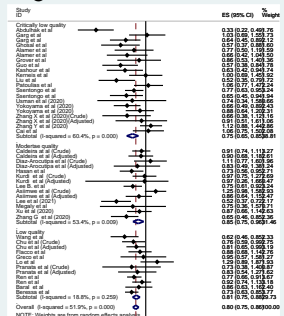

Overall (f-squared = 51.9%,  $p = 0.000$ )

### Death for ACEIs/ARBs

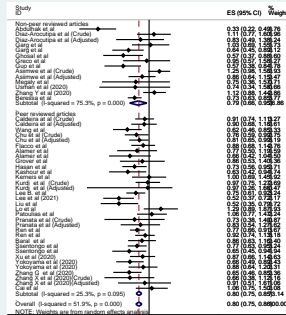

NOTE: Weights are from random effects model.

### Death for ACEIs/ARBs

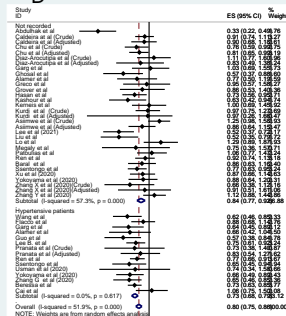

Overall (I-squared = 51.9%,  $p = 0.000$ )
